# Supplementary material for: Iron and cobalt complexes of 5,5′-di(methylene-N-aminoacidyl)-2,2′-bipyridyl ligands: ligand design for diastereoselectivity and anion bindingElectronic supplementary information (ESI) available: 1H NMR spectrum of [Co(1)3]3+ as a function of pH; 2D NOESY 1H NMR spectrum of [Co(1)3Cl2]+; 2D ROESY 1H NMR spectrum of [Co(1)3]3+. See http://www.rsc.org/suppdata/dt/b2/b208934c/
Source: Royal Society of Chemistry journal article supplement (doi:10.1039/b208934c), 2003-01-10

Supplementary Material (ESI) for Dalton Transactions  
This journal is © The Royal Society of Chemistry 2003

**Iron and Cobalt Complexes of 5,5'-di(methylene –N -aminoacidyl)- 2,2'-  
Bipyridyl Ligands: Ligand Design for Diastereoselectivity and Anion Binding.**

**Shane G. Telfer,<sup>a</sup> Gérald Bernardinelli,<sup>b</sup> and Alan F. Williams.<sup>a</sup>**

<sup>a</sup> *Département de Chimie minérale, analytique et appliquée, Université de Genève, 30 quai Ernest Ansermet, CH 1211 Genève 4, Switzerland. Fax: ++ 41 22 702 60 69. e-mail: Alan.Williams@chiam.unige.ch*

<sup>b</sup> *Laboratoire de Cristallographie aux Rayons-X, Université de Genève, 24 quai Ernest Ansermet, CH 1211 Genève 4, Switzerland.*

**Electronic supplementary information**

Figure S1.  $^1\text{H}$  nmr spectra of the complex  $[\text{Co}(\mathbf{1})_3]^{3+}$  in  $\text{D}_2\text{O}$  as a function of pH.

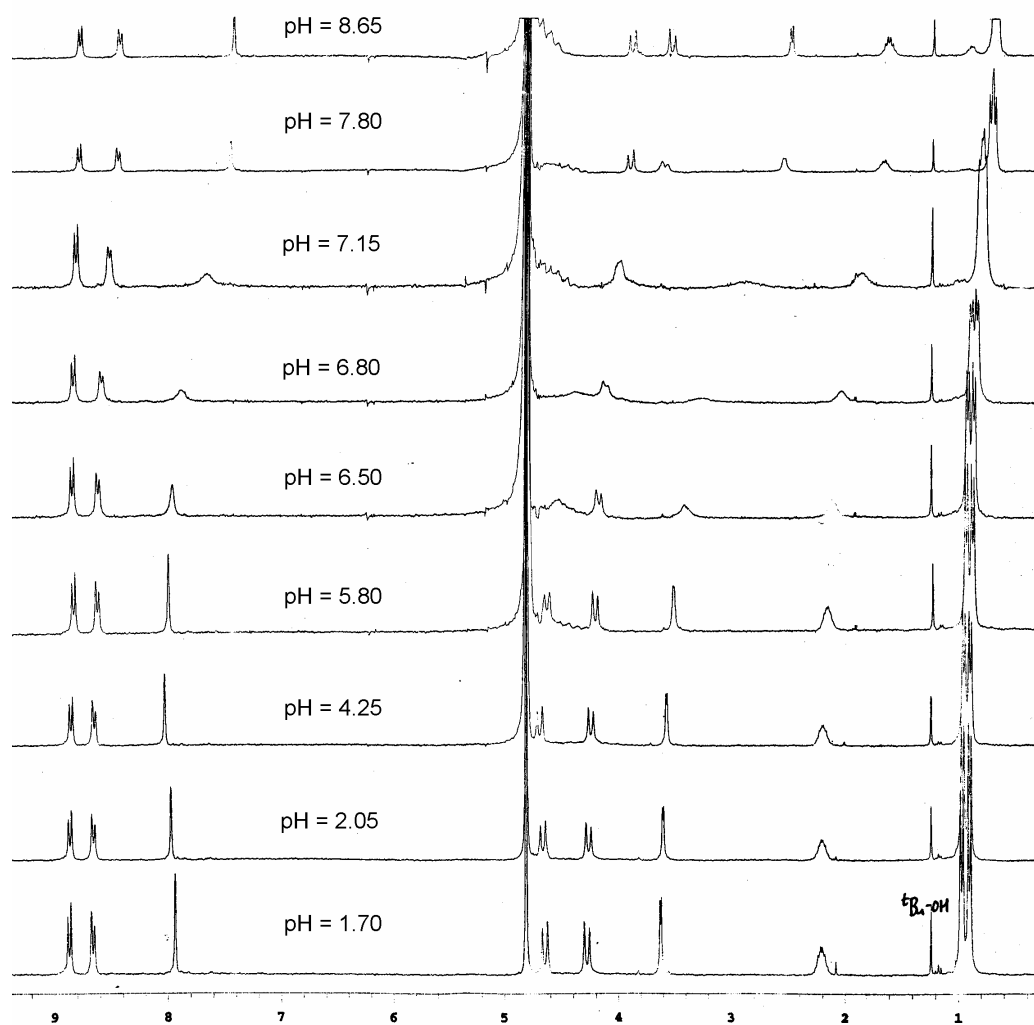

**Fig. S2** 2D NOESY  $^1\text{H}$  NMR spectrum of  $[\text{Co}(\mathbf{1})_3\text{Cl}_2]^+$  in  $\text{CD}_3\text{OD}$ . The proton numbering is shown below. The peaks due to the ligand **1** are apparently weak as a result of the large amount of  $\text{Bu}_4\text{NCl}$  present to ensure chloride coordination.

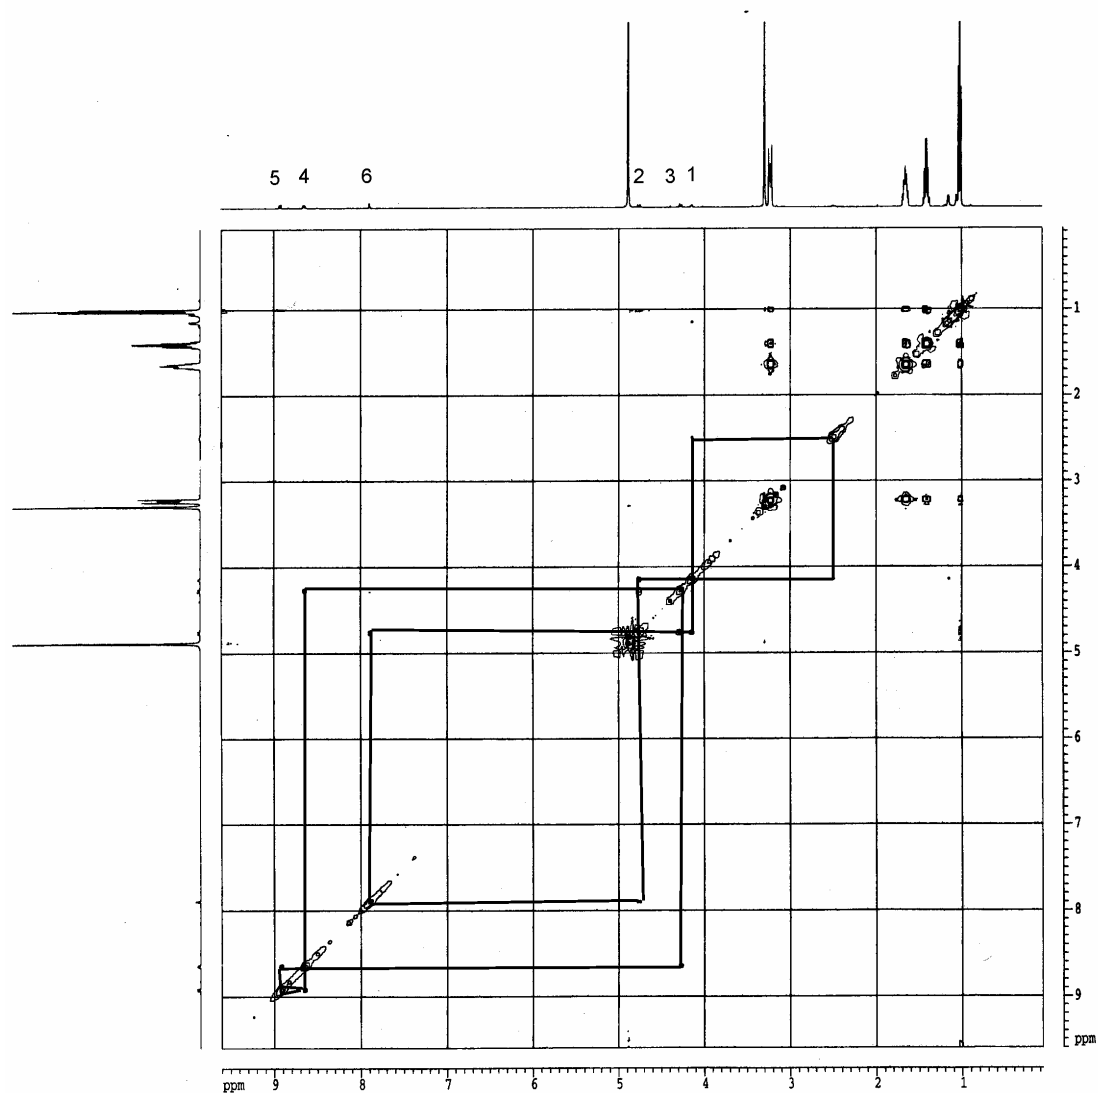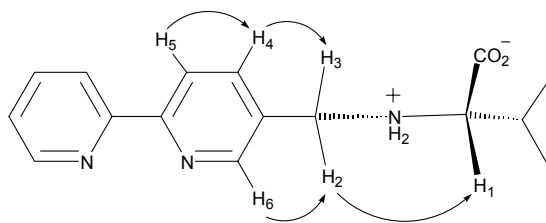

**Fig. S3** 2D ROESY  $^1\text{H}$  NMR spectrum of  $[\text{Co}(\mathbf{1})_3]^{3+}$  in  $\text{D}_2\text{O}$ . The proton numbering is shown below.

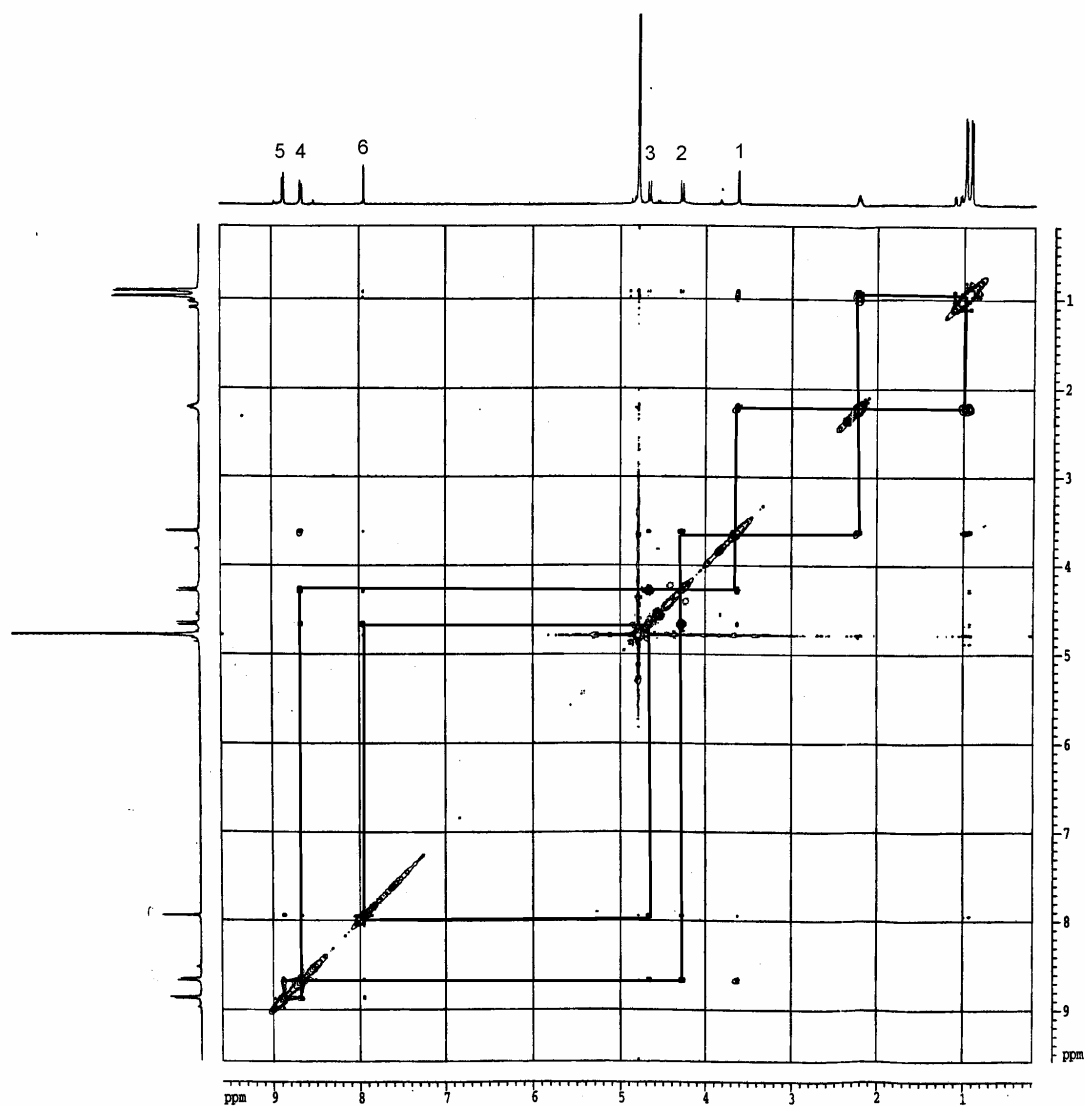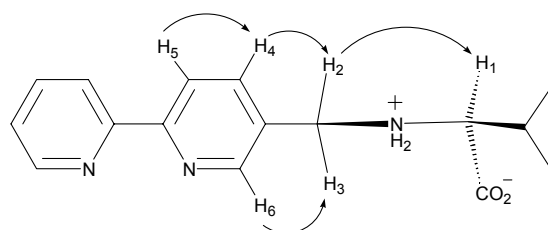

Supplement: b208934c.pdf [file b208934c.pdf]
